# Supplementary material for: Seismicity and thermal structure of the St. Paul Transform System, equatorial Atlantic: insights from focal depth analysis
Source: Copernicus journal article supplement (doi:10.5194/se-16-1059-2025), 2025-10-10
Supplement: Supplementary file 1 [file TableS1_station_list.xlsx]

## Sheet: Sheet1
Station code	Network affiliation	Lat., º	Long., º
ASCN	II	-7.9327	-14.3601
CMC1	ON	-15.3601	-39.5191
CAUB	BL	-8.17683	-36.0102
DBIC	GT	6.67015	-4.85653
MBO	G	14.392	-16.9554
MPG	G	5.11011	-52.6445
NBAN	NB	-9.6687	-36.2745
NBCA	NB	-8.2256	-36.013
NBCL	NB	-4.2244	-38.291
NBLA	NB	-10.9925	-37.789
NBPA	NB	-5.7503	-37.1121
NBPB	NB	-5.546	-39.5837
NBPS	NB	-4.394	-41.4457
NBPV	NB	-6.4175	-35.2905
NBTA	NB	-9.1219	-38.0632
PFBR	NB	-6.1216	-38.2708
RCBR	IU	-5.8274	-35.9014
ROSB	BR	-2.8967	-44.1246
SACV	II	14.9702	-23.6085
SOK	G	14.4944	-16.4562
TRSB	BL	-4.873	-42.7059
