# Supplementary material for: Seismicity and thermal structure of the St. Paul Transform System, equatorial Atlantic: insights from focal depth analysis
Source: Copernicus journal article supplement (doi:10.5194/se-16-1059-2025), 2025-10-10
Supplement: Supplementary file 3 [file TableS2_CRUST10_VM.xlsx]

## Sheet: Velocity Model
Layer (km)	Vp (km/s)	Vs (km/s)	Rho (g/cm^3)
0	1.57	0.16	1.68
0.2	5	2.7	2.55
0.88	6.5	3.7	2.85
2.39	7.1	4.05	3.05
7.05	8.09	4.49	3.33
