# Supplementary material for: Seismicity and thermal structure of the St. Paul Transform System, equatorial Atlantic: insights from focal depth analysis
Source: Copernicus journal article supplement (doi:10.5194/se-16-1059-2025), 2025-10-10
Supplement: Supplementary file 5 [file TableS3_results_Aug1.xlsx]

## Sheet: earthquakes_faulting_plot
Year	Month	Day	Time (GCMT)	Lat., º (GCMT)	Long., º (GCMT)	Mw (GCMT)	Depth, km (GCMT)	Strike,º (GCMT)	Dip,º (GCMT)	Slip,º (GCMT)	Focal Depth, km	Error, km	VR	CN	CT	Station N.	Lat. of Inversion	Temp. ºC (Tm=1150)	Temp. ºC (Tm=1300)
Transform C
2004	9	24	10:35:01	0.87	-25.66	5.8	12	264	86	-177	8	4	0.56	4.8	3.5	5	0.75	728	824.1
2006	3	9	17:56:00.700000	0.79	-25.97	6	16.7	264	84	179	8	4	0.6	3.4	3.2	5	0.71	660.4	746.5
2011	5	15	13:08:22.400000	0.87	-25.62	6.1	12.8	86	88	170	8	3	0.53	5	3.2	5	0.75	757.5	858.3
2017	10	6	02:03:50.100000	0.92	-25.76	5.6	16.6	265	88	-162	11	3	0.43	2	1.3	7	0.74	849.5	960
2018	6	14	18:12:22.400000	0.91	-25.83	5.5	15.3	266	85	-166	9	3	0.42	2.4	3.8	8	0.73	727.2	822
2019	6	1	15:03:03.700000	0.82	-25.91	5.4	12	85	83	163	5	4	0.41	4.5	4.6	8	0.72	436	492.9
2019	6	17	20:03:13.500000	0.77	-26.03	5.6	13.1	86	87	169	5	4	0.62	4.8	4	8	0.7	449	507
2024	6	21	8:53:14 PM	0.79	-26.11	5.6	12	88	84	162	5	3	0.48	4.5	4.8	7	0.695	474.9	536.8
Transform B
2004	4	24	08:03:11	0.99	-27.05	5.4	12	264	75	175	10	4	0.66	5.1	-0.2	5	0.86	658.35	744.3
2012	2	4	18:01:50.200000	1	-26.71	5.2	15	265	89	-165	7	3	0.52	4.9	4.2	7	0.906	528.5	597
2014	8	13	10:07:32.900000	1.06	-26.53	5.5	12	262	87	-175	6	3	0.63	4.7	1	8	0.92	564.7	638.3
2015	2	24	06:54:50.200000	1.07	-26.41	5.3	12	263	88	-169	6	3	0.49	6.4	4	9	0.94	717.45	811
2020	9	18	21:44:07.600000	0.94	-26.91	6.9	13.8	86	87	171	9	4	0.48	4	3.2	9	0.88	609.2	688.7
Transform A
2004	10	25	20:59:58.100000	0.94	-28.83	5.6	12	265	89	162	14	3	0.69	3.2	0.1	6	0.94	638.5	721.6
2005	10	2	6:55:02.700000	0.92	-29.42	5.3	12	262	73	170	9	3	0.67	3.9	1.5	4	0.92	442	499.9
2006	3	4	0:53:34.500000	1.09	-28.01	5.6	20.9	355	84	6	8	5	0.56	4	3.6	5	1.03	506.5	573
2006	6	5	6:18:47.200000	0.91	-27.99	5.3	24.2	171	86	-1	14	2	0.51	2.4	4	5	1.029	759.5	858
2006	6	5	6:27:15.900000	1.12	-27.8	6	15.6	264	89	180	9	4	0.6	2.7	3	4	1.05	679	767
2007	7	3	8:26:07.400000	0.81	-30.04	6.3	17	265	68	176	9	3	0.62	3.4	0.7	4	0.81	548.5	620.5
2008	9	16	7:28:30.900000	0.95	-28.8	5.8	20.8	354	85	-4	14	2	0.61	2.1	0.6	5	0.95	639.5	726
2012	2	14	23:39:20.400000	0.95	-29.1	5.3	12	176	80	9	14	2	0.59	3.9	1	9	0.95	635.1	718
2012	4	7	20:37:56.200000	1.16	-27.95	5.3	15	85	80	172	9	4	0.54	5.5	0.9	7	1.03	582.5	658.5
2015	8	6	21:37:01	1.08	-28.42	5.3	12	266	80	-175	5	3	0.5	6.2	2.4	9	0.98	267	301.7
2016	1	27	15:11:22.200000	1.13	-27.98	5.7	17.7	175	87	-2	12	3	0.56	2.2	3.4	8	1.031	695.5	786
2016	7	24	14:10:55.800000	0.97	-28.77	5.8	23	85	84	-179	18	2	0.6	4.1	1.1	9	0.97	776.8	878.1
2018	5	24	23:11:52.500000	0.88	-29.39	5.6	18.8	267	82	-174	15	3	0.55	2.7	1.2	9	0.88	682.4	771.6
2018	10	16	8:35:39	1.12	-28.07	5.6	15.4	264	76	-171	9	3	0.58	2.1	3.5	8	1	534.5	604
2018	11	10	7:17:54.400000	0.82	-29.45	5.3	17.7	263	82	178	13	2	0.42	2.6	3.8	8	0.89	612.4	692.3
2019	8	5	0:40:49.700000	1.13	-27.79	5.9	12.9	176	76	0	6	4	0.53	7	4.4	7	1.051	544.5	614.3
2020	8	30	21:20:37.100000	0.84	-29.99	6.5	17.1	175	77	-13	10	5	0.55	3.7	4	8	0.84	578.5	654.6
2020	11	8	6:31:17.100000	1.02	-28.08	5.3	14.9	174	84	-1	8	4	0.58	4.8	4.8	7	1.024	481.5	544
2023	11	19	17:00:25	0.92	-28.82	5.3	17.5	177	83	10	16	3	0.44	4.1	4.2	6	0.92	710.05	802.5
2023	11	21	5:10:31	0.95	-28.81	5.4	18.5	175	78	12	12	4	0.48	3.4	4.8	7	0.95	561.5	634.8
2025	3	28	0:34:28	0.85	-29.5	6.1	20	175	81	-8	11	3	0.4	3	2.4	7	0.88	535.7	605.6
2025	3	28	17:17:40	0.86	-29.67	6.6	19.4	175	80	-9	13	5	0.56	2.6	2.8	6	0.875	636.3	719.3
