# Supplementary material for: Seismicity and thermal structure of the St. Paul Transform System, equatorial Atlantic: insights from focal depth analysis
Source: Copernicus journal article supplement (doi:10.5194/se-16-1059-2025), 2025-10-10
Supplement: Supplementary file [file se-16-1059-2025-supplement-title-page.pdf › se-16-1059-2025-supplement-title-page.pdf]

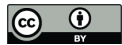

## *Supplement of*

# **Seismicity and thermal structure of the St. Paul Transform System, equatorial Atlantic: insights from focal depth analysis**

**Guilherme W. S. de Melo et al.**

*Correspondence to:* Guilherme W. S. de Melo ([gdemelo@geomar.de](mailto:gdemelo@geomar.de))

- [se-16-1059-2025-supplement-title-page.pdf](#)
- [SPTS\\_focal\\_depth\\_manuscripts\\_SupplementMaterial.pdf](#)
- [TableS1\\_station\\_list.xlsx](#)
- [TableS2\\_CRUST10\\_VM.xlsx](#)
- [TableS3\\_results\\_Aug1.xlsx](#)
- [TableS4\\_Model\\_parameters.pdf](#)

The copyright of individual parts of the supplement might differ from the article licence.
